# Supplementary material for: Acute expression of human APOBEC3B in mice causes lethality associated with RNA editing
Source: Research Square preprint supplement (doi:10.21203/rs.3.rs-1715047/v1), 2022-07-13
Supplement: Supplementary file 1 [file b6b1de2500bbddcabff67b8a.xlsx]

## Sheet: All chromosomes Liver
						Frequency of editing per mouse
	Chromosome	Position	Gene	Region	# mice with edit	mouse #9	mouse #10	mouse #11	mouse #6	mouse #7	mouse #8
	Chr 1	133365085	Ren2	downstream_gene_variant	2	0.611		0.6
		118608168	Clasp1	3_prime_UTR_variant	2			0.474			0.5
		93848240	D2hgdh	synonymous_variant	1	0.423
		133321707	Golt1a	3_prime_UTR_variant	1	0.555
		192073756	Traf5	intron_variant	1	0.286
		161006076	Serpinc1	downstream_gene_variant	1		0.204
		153909458	Glul	3_prime_UTR_variant	1				0.418
		171463957	F11r	3_prime_UTR_variant	1				0.252
		191912963	Slc30a1	3_prime_UTR_variant	1					0.204
	Chr2	18685817	Bmi1	3_prime_UTR_variant	2	0.304	0.48
		35730928	Dab2ip	3_prime_UTR_variant	2	0.333	0.429
		156392813	2900097C17Rik	non_coding_transcript_exon_variant	2					0.316	0.569
		84809852	Ube2l6	3_prime_UTR_variant	1			0.431
		172465614	Pxmp4	intron_variant	1				0.324
		154584934	Pxmp4	downstream_gene_variant	1					0.57
	Chr3	14872058	Car3	3_prime_UTR_variant	1	0.304
		122016077	Arhgap29	3_prime_UTR_variant	1					0.308
		94696826	Selenbp2	missense_variant	1					0.266
		103741646	Hipk1	3_prime_UTR_variant	1					0.442
	Chr4	49385794	Acnat2	intron_variant	4	0.432	0.464			0.487	0.391
		129321863	Rbbp4	synonymous_variant	4	0.489	0.389		0.524		0.577
		129219858	C77080	3_prime_UTR_variant	3		0.519	0.563	0.591
		129341799	Zbtb8os	synonymous_variant	3		0.49	0.28	0.394
		129524295	Hdac1	synonymous_variant	3			0.286	0.37		0.342
		15918145	Decr1	3_prime_UTR_variant	2		0.542		0.553
		129616058	Iqcc	3_prime_UTR_variant	2		0.526				0.55
		139291478	Capzb	3_prime_UTR_variant	2		0.442		0.378
		129626969	Txlna	3_prime_UTR_variant	2			0.464	0.551
		115425697	Cyp4a12b	intron_variant	1				0.202
		129084375	Rnf19b	3_prime_UTR_variant	1				0.471
		152303982	Icmt	3_prime_UTR_variant	1				0.25
		129346937	Zbtb8os	3_prime_UTR_variant	1					0.274
		149202526	Kif1b	synonymous_variant	1					0.382
		150706209	Slc45a1-1700045H11Rik	intergenic_region	1					0.385
		128774037	Zfp362	3_prime_UTR_variant	1						0.571
		129607840	Tmem234	3_prime_UTR_variant	1						0.333
		59903885	Snx30	3_prime_UTR_variant	1		0.619
		129616533	Iqcc	synonymous_variant	1		0.524
		129221102	C77080	3_prime_UTR_variant	1		0.5
	Chr5	139800712	Mafk	3_prime_UTR_variant	5	0.458		0.476	0.49	0.519	0.529
		135628590	Rhbdd2	upstream_gene_variant	1	0.514
		28051887	Htr5a-Insig1	intergenic_region	1		0.204
		125460119	Bri3bp	3_prime_UTR_variant	1		0.232
		87132764	Ugt2b5	intron_variant	1				0.4
	Chr6	31509021	Mkln1	3_prime_UTR_variant	3	0.242			0.421	0.308
		120768958	Cecr2	3_prime_UTR_variant	2		0.5		0.55
		147016862	Ppfibp1	intron_variant	1			0.375
		88743735	Mgll	intron_variant	1				0.455
		145214575	Casc1	upstream_gene_variant	1				0.553
		145214678	Casc1	upstream_gene_variant	1				0.434
		7982958	C1galt1-Col28a1	intergenic_region	1						0.442
		141875893	Slco1a4-Slco1a1	intergenic_region	1						0.22
	Chr7	30962908	Lsr	intron_variant	4		0.361		0.31	0.245	0.222
		118736653	Ccp110	3_prime_UTR_variant	3	0.231			0.292	0.429
		30738376	Gapdhs	intron_variant	2				0.25	0.2
		3221909	Nlrp12	3_prime_UTR_variant	1		0.323
		110629658	Adm	3_prime_UTR_variant	1			0.333
	Chr8	117461117	Cmip	3_prime_UTR_variant	4	0.44		0.284	0.387		0.451
		41341345	Asah1	3_prime_UTR_variant	3		0.438		0.405		0.478
		41400789	Frg1	synonymous_variant	3		0.542		0.488		0.481
		123835055	Rab4a	3_prime_UTR_variant	2			0.609			0.503
		20272209	6820431F20Rik	non_coding_transcript_exon_variant	1				0.25
		41349554	Asah1	synonymous_variant	1				0.6
	chr9	78239550	Gsta1	missense_variant	1	0.208
		4309273	Aasdhppt	missense_variant	1						0.503
	Chr10	69175003	Tmem26-Rhobtb1	intergenic_region	5	0.205	0.215	0.259	0.254	0.37
		52436629	Nus1	missense_variant	2	0.208	0.299
		75833352	Gstt2	intron_variant	2		0.25		0.226
		41529050	Cd164	3_prime_UTR_variant	1		0.341
		47452541	Snord14d-C130030K03Rik	intergenic_region	1	0.52
	Chr11	58221927	Irgm2	3_prime_UTR_variant	4	0.544	0.414	0.424	0.357
		58199689	Igtp	5_prime_UTR_premature_start_codon_gain_variant	3	0.534			0.543	0.437
		88366837	Msi2	synonymous_variant	3		0.545	0.314		0.393
		88837181	Akap1	synonymous_variant	2		0.439			0.525
		97757809	Cwc25	splice_region_variant&synonymous_variant	2				0.294		0.222
		3164673	Sfi1	missense_variant	1	0.304
		58137762	Gemin5	synonymous_variant	1	0.318
		3135671	Sfi1	missense_variant	1		0.417
		69919502	Gps2	downstream_gene_variant	1				0.375
	Chr12	71319152	Dact1	3_prime_UTR_variant	4	0.309			0.619	0.347	0.282
		55164236	Srp54b	5_prime_UTR_variant	2	0.286				0.225
		113145394	Crip2	3_prime_UTR_variant	2				0.519	0.545
		85135324	Dlst	downstream_gene_variant	1	0.5
		110858563	Zfp839	intron_variant	1			0.474
		103858742	Serpina1a	intron_variant	1				0.3
		103900076	Serpina1c	intron_variant	1				0.524
		8008054	Apob	stop_gained	1	0.237
	Chr13	15119184	AW209491-Gli3	intergenic_region	1		0.364
	Chr14	30988368	Nek4	3_prime_UTR_variant	1		0.543
		46084428	Gm1821	non_coding_transcript_exon_variant	1				0.368
	Chr15	84945954	5031439G07Rik	3_prime_UTR_variant	2			0.551	0.51
		100012705	Larp4	3_prime_UTR_variant	1	0.332
		81811719	Tef	splice_region_variant&synonymous_variant	1					0.477
		10987368	Amacr	intron_variant	1				0.222
	Chr16	91871279	Itsn1	3_prime_UTR_variant	2	0.348				0.208
		76403207	Nrip1-1700041M19Rik	intergenic_region	1			0.213
		98010523	B230307C23Rik	intron_variant	1						0.2
	Chr17	87035550	Cript	3_prime_UTR_variant	3		0.25		0.317	0.25
		33957865	Vps52	synonymous_variant	2	0.58		0.639
		34022661	Ring1	missense_variant	2	0.488		0.636
		34038245	Rxrb	3_prime_UTR_variant	2	0.52		0.397
		34193922	Tap1	synonymous_variant	2	0.437		0.54
		34596301	Pbx2	3_prime_UTR_variant	2	0.467		0.517
		35094279	Abhd16a	synonymous_variant	2	0.457		0.356
		36017533	H2-T24	synonymous_variant	2	0.524		0.4
		36259948	Trim39	3_prime_UTR_variant	2	0.419		0.333
		27820369	D17Wsu92e	5_prime_UTR_variant	1	0.514
		33300694	Zfp955b	synonymous_variant	1	0.474
		33777657	Angptl4	intron_variant	1	0.429
		33848670	Cd320	3_prime_UTR_variant	1	0.481
		34030809	H2-Ke6	upstream_gene_variant	1	0.409
		34267349	H2-Ab1	synonymous_variant	1	0.487
		34284387	H2-Aa	missense_variant	1	0.435
		34596743	Pbx2	3_prime_UTR_variant	1	0.611
		34850176	Skiv2l	5_prime_UTR_variant	1	0.565
		34997888	D17H6S56E-5	missense_variant	1	0.308
		35102149	Abhd16a	synonymous_variant	1	0.422
		35664595	Vars2	synonymous_variant	1	0.357
		35883886	Dhx16	synonymous_variant	1	0.476
		35989267	Gnl1	3_prime_UTR_variant	1	0.545
		36951642	Ppp1r11	5_prime_UTR_premature_start_codon_gain_variant	1			0.532
		64754990	Man2a1	3_prime_UTR_variant	1			0.25
		7369785	Gm9992	missense_variant	1						0.212
		8147734	Rnaset2b	5_prime_UTR_variant	1						0.324
		28062277	Anks1	3_prime_UTR_variant	1						0.423
		28448582	Fkbp5	intron_variant	1						0.505
		33774937	Angptl4	3_prime_UTR_variant	1			0.521
		33818130	Kank3	missense_variant	1			0.483
		34836881	Stk19	5_prime_UTR_variant	1			0.563
		34842989	Skiv2l	synonymous_variant	1			0.512
		35010527	Vars	synonymous_variant	1			0.307
		35101294	Abhd16a	synonymous_variant	1			0.517
		35883137	Dhx16	missense_variant	1			0.63
		36017252	H2-T24	missense_variant	1			0.5
	chr18	35806339	Ube2d2a	3_prime_UTR_variant	5	0.238	0.279		0.373	0.382	0.25
		42338743	Rbm27	3_prime_UTR_variant	1	0.25
	Chr19	42193896	Zfyve27	3_prime_UTR_variant	1						0.313
	chrX	74311466	Gdi1	3_prime_UTR_variant	2	0.376		0.54
		103499030	Jpx	intron_variant	1	0.647
		144274803	A730046J19Rik-Alg13	intergenic_region	1	0.268
				Total of edits per mouse		55	32	37	43	26	26
				3' UTR		21	17	16	20	12	12
				5' UTR		4		2	1	2	1
				Downstream region		2	1	1	1	1
				Intergenic region		3	3	2	1	2	2
				Intronic region		4	3	2	10	3	4
				Missense		6	2	4		1	2
				Splice region					1	1	1
				Stop gain		1
				Synonymous		12	6	10	5	3	3
				Upstream region		2			2
				Exonic region					2	1	1

## Sheet: All chromosomes Pancreas
						Frequency of editing per mouse
	Chromosome	Position	Gene	Region	# mice	mouse #9	mouse #10	mouse #11	mouse #6	mouse #7	mouse #8
	Chr 1	93848240	D2hgdh	synonymous_variant	2	0.478		0.429
		118608168	Clasp1	3_prime_UTR_variant	2	0.6		0.452
		153909458	Glul	3_prime_UTR_variant	2			0.323		0.325
		183099965	Disp1	synonymous_variant	3			0.409		0.5	0.636
		156849313	Ralgps2	intron_variant	1						0.647
		192073756	Traf5	intron_variant	1						0.318
		128038772	Zranb3	intron_variant	1						0.294
		172506909	Tagln2	3_prime_UTR_variant	1	0.474
		45857632	Wdr75-Slc40a1	intergenic_region	1		0.6
		67231097	Cps1	3_prime_UTR_variant	1		0.412
		67160915	Cps1	synonymous_variant	1			0.245
		78665144	Utp14b	missense_variant	1			0.294
		173934496	Ifi203	intron_variant	1			0.364
		173934694	Ifi203	intron_variant	1			0.286
	Chr2	84809852	Ube2l6	3_prime_UTR_variant	2	0.289	0.339
		115777134	BC052040	3_prime_UTR_variant	2	0.324					0.231
		172465614	Rtfdc1	intron_variant	2			0.294	0.211
		35730928	Dab2ip	3_prime_UTR_variant	2				0.212	0.391
		18685817	Bmi1	3_prime_UTR_variant	1						0.2
	Chr3	15795343	LOC100038947	3_prime_UTR_variant	2		0.31				0.6
		15802596	LOC100038947	synonymous_variant	1	0.542
		57441369	Tm4sf4	3_prime_UTR_variant	1			0.22
		142549320	Gbp7	3_prime_UTR_variant	1			0.219
		146983391	Ttll7	3_prime_UTR_variant	1				0.214
	Chr4	128774037	Zfp362	3_prime_UTR_variant	2	0.517					0.56
		143417874	Pramef8	synonymous_variant	2		0.516				0.516
		129221102	C77080	3_prime_UTR_variant	2		0.442		0.386
		129321863	Rbbp4	synonymous_variant	2		0.5				0.511
		129341799	Zbtb8os	synonymous_variant	2		0.51		0.479
		129524295	Hdac1	synonymous_variant	3		0.324		0.32		0.271
		129200774	Yars	synonymous_variant	2		0.516				0.425
		143419321	Pramef8	synonymous_variant	2		0.597				0.583
		129626969	Txlna	3_prime_UTR_variant	2				0.398		0.449
		151057920	Vamp3	5_prime_UTR_variant	2					0.484	0.486
		15918145	Decr1	3_prime_UTR_variant	1	0.521
		148953514	Casz1	3_prime_UTR_variant	1	0.237
		59902938	Snx30	3_prime_UTR_variant	1		0.6
		79328255	A430085M09Rik-Tyrp1	intergenic_region	1		0.333
		129084375	Rnf19b	3_prime_UTR_variant	1		0.482
		135324818	Srrm1	splice_donor_variant&intron_variant	1			0.3
		122860610	Ppt1	downstream_gene_variant	1				0.25
		129849807	Ptp4a2	3_prime_UTR_variant	1				0.532
		12133783	Rbm12b2-Rbm12b1	intergenic_region	1					0.25
		59618513	Hsdl2	3_prime_UTR_variant	1					0.214
		59903885	Snx30	3_prime_UTR_variant	1					0.438
		149274985	Kif1b	synonymous_variant	1					0.36
		149718814	Tmem201	synonymous_variant	1					0.5
		41011936	Nfx1	3_prime_UTR_variant	1						0.24
		129515375	Marcksl1	3_prime_UTR_variant	1						0.523
		129616058	Iqcc	3_prime_UTR_variant	1						0.444
		130058321	Col16a1	missense_variant	1						0.528
		149984056	H6pd	missense_variant	1						0.508
		150567676	Rere	intron_variant	1						0.533
		151005836	Per3	3_prime_UTR_variant	1						0.633
	Chr5	139800712	Mafk	3_prime_UTR_variant	4	0.528	0.508			0.575	0.494
		73020961	Fryl	3_prime_UTR_variant	2		0.633		0.267
		43911544	Cd38	3_prime_UTR_variant	1				0.316
		93167781	Sept11	intron_variant	1				0.278
		146290517	Cdk8	intron_variant	1				0.294
		122193643	Ppp1cc-Hvcn1	intergenic_region	1						0.5
	Chr6	120848555	Bcl2l13	synonymous_variant	2	0.452	0.452
		120531195	Cecr5	missense_variant	3		0.455	0.382	0.538
		120900339	Bid	missense_variant	2		0.347		0.542
		145214575	Casc1	upstream_gene_variant	2		0.382	0.304
		145214678	Casc1	upstream_gene_variant	2		0.421	0.378
		146776412	Stk38l	3_prime_UTR_variant	3		0.5	0.468	0.364
		145169461	Lrmp	intron_variant	2			0.3	0.333
		142775444	Cmas	3_prime_UTR_variant	1	0.429
		145266779	Gm15706-1700073E17Rik	intergenic_region	1	0.346
		41201304	2210010C04Rik-Try4	intergenic_region	1		0.375
		82738370	Hk2	synonymous_variant	1		0.414
		145962112	Sspn	3_prime_UTR_variant	1		0.32
		147016862	Ppfibp1	intron_variant	1		0.347
		145214360	Casc1	upstream_gene_variant	1			0.417
		146591647	Fgfr1op2	intron_variant	1			0.5
		83033427	Dok1	missense_variant	1					0.5
		136610765	Atf7ip	downstream_gene_variant	1				0.316
		146598941	Fgfr1op2	3_prime_UTR_variant	1				0.457
		147001785	Ppfibp1	intron_variant	1				0.444
		7982958	C1galt1-Col28a1	intergenic_region	1						0.508
		41442733	Gm10334	missense_variant	1						0.219
		90232520	Vmn1r53-Vmn1r54	intergenic_region	1						0.588
		138153282	Mgst1	intron_variant	1						0.545
	Chr7	110629658	Adm	3_prime_UTR_variant	2			0.308			0.438
		118736653	Ccp110	3_prime_UTR_variant	2			0.25		0.303
		67667277	Ttc23	stop_gained	2					0.233	0.261
		101573753	Art2a-ps-Art2b	intergenic_region	1	0.35
		106505667	Gm4759-Gm1966	intergenic_region	1			0.395
		28258466	Dyrk1b-Eid2	intergenic_region	1				0.425
	Chr8	123835055	Rab4a	3_prime_UTR_variant	3	0.517	0.471	0.634
		19691613	Defb7-4930467E23Rik	intergenic_region	3		0.543		0.566	0.259
		22587552	Vdac3	splice_donor_variant&intron_variant	2		0.5		0.545
		117461117	Cmip	3_prime_UTR_variant	2				0.233	0.404
		55400715	Gpm6a-Adam29	intergenic_region	2				0.316		0.35
		70779744	Mast3	synonymous_variant	1	0.314
		22220666	vdac3	downstream_gene_variant	1				0.333
		41400789	Frg1	synonymous_variant	1				0.505
		19988302	Gm21119	intron_variant	1						0.238
		55394061	Gpm6a-Adam29	intergenic_region	1						0.471
	chr9	33728724	Gm27162-7630403G23Rik	intergenic_region	1	0.211
		4309273	Aasdhppt	missense_variant	1			0.496
		7751763	Mmp7-Tmem123	intergenic_region	1			0.214
		32754282	Ets1	missense_variant	1				0.202
		70779543	Adam10	3_prime_UTR_variant	1				0.333
	Chr10	69175003	Tmem26-Rhobtb1	intergenic_region	3	0.517		0.262		0.523
		86348437	Timp3	3_prime_UTR_variant	3	0.37	0.39	0.317
		34608623	Frk	3_prime_UTR_variant	2			0.212	0.364
		52436629	Nus1	missense_variant	1		0.209
		96044280	Eea1	3_prime_UTR_variant	1			0.348
		115198979	Tbc1d15	3_prime_UTR_variant	1					0.528
	Chr11	58137762	Gemin5	synonymous_variant	2	0.522	0.457
		58199689	Igtp	5_prime_UTR_premature_start_codon_gain_variant	3	0.492	0.398		0.324
		71024592	Mis12	5_prime_UTR_variant	3	0.452	0.426		0.483
		86937777	Ypel2	3_prime_UTR_variant	5	0.222	0.235	0.304	0.231		0.45
		88366837	Msi2	synonymous_variant	2	0.485					0.529
		88999455	Trim25	5_prime_UTR_variant	3	0.49	0.643	0.472
		87096969	Prr11	synonymous_variant	2		0.412	0.471
		88080962	Vezf1	intron_variant	4		0.5	0.314	0.563		0.467
		89011046	Trim25	intron_variant	2		0.368	0.45
		93956103	Nme2	5_prime_UTR_variant	2		0.368				0.647
		89055474	Dgke	missense_variant	2			0.5	0.619
		88981672	Coil	synonymous_variant	1	0.553
		58221927	Irgm2	3_prime_UTR_variant	1		0.479
		73135683	Gsg2	3_prime_UTR_variant	1		0.533
		89035990	Dgke	downstream_gene_variant	1		0.5
		112785645	Sox9	3_prime_UTR_variant	1		0.533
		88340851	Msi2	3_prime_UTR_variant	1			0.368
		89014594	Trim25	intron_variant	1			0.2
		59962146	Med9	3_prime_UTR_variant	1					0.235
		82905375	Nle1	missense_variant&splice_region_variant	1					0.467
		5555100	Ccdc117-Ankrd36	intergenic_region	1				0.556
		70943843	Rabep1	downstream_gene_variant	1				0.645
		89035638	Dgke	downstream_gene_variant	1				0.625
		89039600	Dgke	3_prime_UTR_variant	1				0.5
		58984314	Trim11	intron_variant	1						0.233
		88890926	4930556N13Rik-Scpep1os	intergenic_region	1						0.438
	Chr12	55164236	Srp54b	5_prime_UTR_variant	2	0.289		0.245
		103896071	Serpina1c	synonymous_variant	2	0.284	0.261
		103730483	Serpina1b	synonymous_variant	2				0.522	0.233
		113072639	Pacs2	3_prime_UTR_variant	2				0.5	0.276
		110858563	Zfp839	intron_variant	1		0.389
		67511094	Mdga2-Rps29	intergenic_region	1			0.25
		84783807	Ltbp2	3_prime_UTR_variant	1			0.423
		113072954	Pacs2	3_prime_UTR_variant	1				0.607
		113133915	Mta1	intron_variant	1				0.421
		33250813	Atxn7l1	3_prime_UTR_variant	1					0.227
	Chr13	15119184	AW209491-Gli3	intergenic_region	2		0.296				0.3
		14022869	Tbce	intron_variant	1			0.424
		6582504	Pfkp	splice_region_variant&synonymous_variant	1				0.204
		67181957	Rsl1	synonymous_variant	1					0.313
		81066101	9330111N05Rik	intron_variant	1					0.263
	Chr14	30988368	Nek4	3_prime_UTR_variant	3	0.333		0.389			0.481
		54531434	Prmt5-Haus4	intergenic_region	2				0.353		0.353
		14107104	Atxn7	3_prime_UTR_variant	1					0.214
		46084656	Gm1821	intron_variant	1					0.275
		51192915	Ang2	downstream_gene_variant	1			0.333
	Chr15	100012705	Larp4	3_prime_UTR_variant	3	0.435		0.294			0.448
		79912863	Apobec3	downstream_gene_variant	2		0.208			0.313
		84945954	5031439G07Rik	3_prime_UTR_variant	3		0.4	0.465	0.45
		81811719	Tef	splice_region_variant&synonymous_variant	1					0.481
	Chr16	94416284	Ttc3	missense_variant&splice_region_variant	1			0.536
		94452965	Ttc3	missense_variant&splice_region_variant	1			0.388
		44160354	Naa50	3_prime_UTR_variant	1					0.306
	Chr17	27820369	D17Wsu92e	5_prime_UTR_variant	2	0.545	0.5
		33243747	Zfp955a	missense_variant	2	0.609	0.638
		34193922	Tap1	synonymous_variant	2	0.402	0.483
		34596743	Pbx2	3_prime_UTR_variant	2	0.565	0.481
		34836881	Stk19	5_prime_UTR_variant	2	0.447	0.418
		34842989	Skiv2l	synonymous_variant	2	0.44	0.607
		35101294	Abhd16a	synonymous_variant	2	0.438	0.483
		35102149	Abhd16a	synonymous_variant	2	0.374	0.494
		35866900	Ppp1r18	5_prime_UTR_variant	2	0.481	0.449
		35883886	Dhx16	synonymous_variant	2	0.474	0.471
		35930794	Ppp1r10	synonymous_variant	2	0.482	0.477
		35989267	Gnl1	3_prime_UTR_variant	2	0.45	0.393
		36259948	Trim39	3_prime_UTR_variant	2	0.41	0.488
		36858955	Trim26	3_prime_UTR_variant	2	0.443	0.606
		33774937	Angptl4	3_prime_UTR_variant	1	0.547
		34030404	Slc39a7	missense_variant	1	0.529
		34596301	Pbx2	3_prime_UTR_variant	1	0.456
		34832527	Stk19	synonymous_variant	1	0.364
		35098925	Abhd16a	synonymous_variant	1	0.479
		35250089	Mir8094	upstream_gene_variant	1	0.413
		35250434	Mir8094	upstream_gene_variant	1	0.541
		35664153	Vars2	synonymous_variant	1	0.316
		36858903	Trim26	3_prime_UTR_variant	1	0.465
		36951642	Ppp1r11	5_prime_UTR_premature_start_codon_gain_variant	1	0.521
		24528701	Traf7	upstream_gene_variant	1		0.25
		28742614	Mapk14	intron_variant	1		0.308
		33300694	Zfp955b	synonymous_variant	1		0.435
		33957865	Vps52	synonymous_variant	1		0.491
		34022661	Ring1	missense_variant	1		0.396
		34244331	H2-Ob	3_prime_UTR_variant	1		0.222
		35057385	Ddah2	upstream_gene_variant	1		0.316
		35094279	Abhd16a	synonymous_variant	1		0.462
		36017533	H2-T24	synonymous_variant	1		0.333
		36263101	Trim39	intron_variant	1		0.438
		87035550	Cript	3_prime_UTR_variant	1		0.289
		28062277	Anks1	3_prime_UTR_variant	1						0.452
		29096808	Cdkn1a	intron_variant	1						0.3
		29207244	Cpne5	intron_variant	1						0.412
		36127842	Gm7030	missense_variant	1						0.636
		42890752	Cd2ap-Tnfrsf21	intergenic_region	1						0.224
	chr18	42338743	Rbm27	3_prime_UTR_variant	5	0.246		0.218	0.218	0.383	0.25
		46741380	Atg12	splice_donor_variant&intron_variant	1			0.318
		74370004	Cfap53-Myo5b	intergenic_region	1				0.471
		11645078	Rbbp8	intron_variant	1					0.429
		15832844	Chst9-Cdh2	intergenic_region	1					0.278
		36647162	Ankhd1	stop_gained	1					0.235
		26003854	Celf4-4930474G06Rik	intergenic_region	1						0.316
	Chr19	4041050	Gstp2	missense_variant	1	0.318
		5693793	Pcnx3	upstream_gene_variant	1			0.353
		5707758	Ehbp1l1	3_prime_UTR_variant	1			0.585
		34587589	Ifit3	synonymous_variant	1			0.274
		34611959	Ifit3b	synonymous_variant	1					0.299
	chrX	74311466	Gdi1	3_prime_UTR_variant	2	0.405		0.36
		144274093	A730046J19Rik-Alg13	intergenic_region	1			0.526
				Total of edits per mouse		57	74	54	48	34	50
				3' UTR		23	23	20	18	14	16
				5' UTR		8	7	2	2	1	2
				Downstream region			2	1	5	1
				Intergenic region		4	5	5	6	4	10
				Intronic region			6	9	7	3	10
				Missense		3	5	4	4	1	4
				Splice region			1	4	2	2
				Stop gain						2	1
				Synonymous		17	21	5	4	6	7
				Upstream region		2	4	4
